# Supplementary material
Source: PubMed Central journal article supplement (PMC7457385)
Supplement: NIHMS912463-supplement-912463_SuppTable1.pdf [file NIHMS912463-supplement-912463_SuppTable1.pdf]

**Supplementary Table 1: Fly genotypes for functional characterizations.**

| Stock Genotype                                                                                                                                                                                  | Cells manipulated / Effector                         | Cells Recorded / Indicator | Used in Figure                  |
|-------------------------------------------------------------------------------------------------------------------------------------------------------------------------------------------------|------------------------------------------------------|----------------------------|---------------------------------|
| <i>w+(DL)/w<sup>1118</sup>;VT049479-LexAp65 (attP40)/ R38G02-p65ADZp (attP40); UAS-CsChrimson-mCherry (su(Hw)attP1), pGP-JFRC59-13XLexAop2-IVS-p10-GCaMP6f (VK00005)/ R24A07-ZpGdbd (attP2)</i> | LPi4-3/ CsChrimson                                   | LPLC2/GCaMP6f              | Fig. 5e-i, Ext Fig. 7           |
| <i>w+(DL)/w<sup>1118</sup>;VT049479-LexAp65 (attP40)/ BPp65ADZp (attP40); UAS-CsChrimson-mCherry (su(Hw)attP1), pGP-JFRC59-13XLexAop2-IVS-p10-GCaMP6f (VK00005)/ BPZpGdbd (attP2)</i>           | Enhancerless Split Gal4/ CsChrimson                  | LPLC2/GCaMP6f              | Ext Fig. 8                      |
| <i>LexAop2-Syn21-opGCaMP6s (su(Hw)attP8), 10XUAS-Syn21-Chrimson-tdT-3.1 (attP18)/w<sup>1118</sup>; VT049479-LexAp65 (attP40)/ R59E08-p65ADZp (attP40); +/R42F06-ZpGdbd (attP2)</i>              | T4,T5/ Chrimson                                      | LPLC2/OpGCaMP6fs           | Ext Fig. 2                      |
| <i>LexAop2-Syn21-opGCaMP6s (su(Hw)attP8), 10XUAS-Syn21-Chrimson-tdT-3.1 (attP18)/w<sup>1118</sup>; VT049479-LexAp65 (attP40)/ BPp65ADZp (attP40); +/ BPZpGdbd (attP2)</i>                       | Enhancerless Split Gal4/ Chrimson                    | LPLC2/OpGCaMP6fs           | Ext Fig. 2                      |
| <i>w+(DL)/w<sup>1118</sup>; +/ R38G02-p65ADZp(attP40); UAS-OpGCaMP6f (VK00005)/R24A07-ZpGdbd(attP2)</i>                                                                                         | none                                                 | LPi4-3/OpGamp6f            | Fig. 5c-d, Ext Fig. 6           |
| <i>w+(DL)/w<sup>1118</sup>; +/ R19G02-p65AD (attP40); UAS-OpGCaMP6f (VK00005)/R75G12-ZpGdbd(attP2)</i>                                                                                          | none                                                 | LPLC2/OpGamp6f             | Fig. 2-4, Ext Fig. 3a-e, 4,5,10 |
| <i>w<sup>1118</sup>/w+;R19G02-p65ADZp (attP40)/UAS-TNTe;R75G12-ZpGdbd (attP2)/+</i>                                                                                                             | LPLC2 (OL0048B) / TNTe                               | none                       | Ext Fig. 3f                     |
| <i>w<sup>1118</sup>/w+; R24A03-p65ADZp (attP40)/UAS-TNTe; R74C01-ZpGdbd (attP2)/+</i>                                                                                                           | Empty brain split-GAL4 control (SS1062) / TNTe       | none                       | Ext Fig. 3f                     |
| <i>w<sup>1118</sup>/w+(DL);R19G02-p65ADZp(attP40)/+ (DL);R75G12-ZpGdbd(attP2)/pJFRC49-10XUAS-IVS-eGFPKir2.1 attP2 (DL)</i>                                                                      | LPLC2 (OL0048B) / Kir2.1                             | none                       | Ext Fig. 3f                     |
| <i>w<sup>1118</sup>/w+(DL); R24A03-p65ADZp (attP40)/+ (DL); R74C01-ZpGdbd(attP2)/pJFRC49-10XUAS-IVS-eGFPKir2.1 attP2 (DL)</i>                                                                   | Empty brain split-GAL4 control (SS1062) / Kir2.1     | none                       | Ext Fig. 3f                     |
| <i>LexAop2-myrGFP (su(Hw) attP8), 20xUAS CsChrimson mVenus (attP18)/ w<sup>1118</sup>; R68A06-LexAp65 (VK00022)/ R19G02-p65AD (attP40); R75G12-DBD-ZpGdbd (attP2)</i>                           | LPLC2 (OL0048B) / CsChrimson                         | Giant fiber/myrGFP         | Fig. 1c                         |
| <i>LexAop2-myrGFP (su(Hw)attP8), 20xUAS CsChrimson mVenus (attP18)/ w<sup>1118</sup>; R68A06-LexAp65 (VK00022) / R24A03-p65ADZp (attP40); R74C01-ZpGdbd (attP2).</i>                            | Empty brain split-GAL4 control (SS1062) / CsChrimson | Giant fiber/myrGFP         | Fig. 1c                         |
