# Supplementary material
Source: PubMed Central journal article supplement (PMC7457385)
Supplement: NIHMS912463-supplement-912463_SuppTable2.pdf [file NIHMS912463-supplement-912463_SuppTable2.pdf]

## Supplementary Table 2: Fly genotypes for anatomical analyses.

| Figure                                         | Driver line(s)                                                                                                               | Reporter transgene(s)                                                                                                                                                                                                                                                                                                                                                                                                                                            | Description of displayed image                                                                                                                                                                                                                                                            | Details of original image (objective, mounting medium, voxel size)                     | Sample size                                                                                                                                                                                                                                                                                                                                               |
|------------------------------------------------|------------------------------------------------------------------------------------------------------------------------------|------------------------------------------------------------------------------------------------------------------------------------------------------------------------------------------------------------------------------------------------------------------------------------------------------------------------------------------------------------------------------------------------------------------------------------------------------------------|-------------------------------------------------------------------------------------------------------------------------------------------------------------------------------------------------------------------------------------------------------------------------------------------|----------------------------------------------------------------------------------------|-----------------------------------------------------------------------------------------------------------------------------------------------------------------------------------------------------------------------------------------------------------------------------------------------------------------------------------------------------------|
| 1a; Ext. 1d; Ext. 9a,d                         | OL0047B [ <i>R19G02-p65ADZp (attP40)</i> ; <i>R12E04-ZpGdbd (attP2)</i> ]                                                    | MCFO-1 [ <i>pBPhsFlp2::PEST (attP3)</i> ]; <i>pJFRC201-10XUAS-FRT&gt;STOP&gt;FRT-myr::smGFP-HA (VK0005)</i> , <i>pJFRC240-10XUAS-FRT&gt;STOP&gt;FRT-myr::smGFP-V5-THS-10XUAS-FRT&gt;STOP&gt;FRT-myr::smGFP-FLAG (su(Hw)attP1)</i> ]                                                                                                                                                                                                                              | Reconstructed view generated from 3D image stack (Vaa3D/NeuronAnnotator screenshot).                                                                                                                                                                                                      | 63x/ NA 1.4, DPX, 0.19 $\mu\text{m}$ x 0.19 $\mu\text{m}$ x 0.38 $\mu\text{m}$         | MCFO-labeled cells from 14 fly brains imaged at high resolution (63x) (~ 120 labeled LPLC2 cells).                                                                                                                                                                                                                                                        |
| 1d,e; 5j,k; Ext. 1c,e,f; Supplementary Video 1 | OL0047B or OL0048B [ <i>R19G02-p65ADZp (attP40)</i> ; <i>R75G12-ZpGdbd (attP2)</i> ]                                         | MCFO-1                                                                                                                                                                                                                                                                                                                                                                                                                                                           | Reconstructed view generated from 3D image stack (Vaa3D/NeuronAnnotator screenshot).<br><br>Cells were manually segmented and colored based on approximate layer positions (using Fluorender and Fiji).<br><br>Illustration in Fig. 5j,k is based on the image from Ext. Fig. 1f (cell2). | 63x/ NA 1.4, DPX, 0.19 $\mu\text{m}$ x 0.19 $\mu\text{m}$ x 0.38 $\mu\text{m}$         | Segmentation and layer-specific coloring was done for the six cells shown.<br><br>The general pattern of LPLC2 arbors in the LP illustrated by these examples was similar for ~ 110 MCFO-labeled cells from 20 brains [OL0047B (14 brains, see above) or OL0048B (6 brains, images generated in a previous study <sup>ref.10</sup> ). (also see Methods). |
| Ext. 1a; Ext. 9c,f                             | SS00810 [ <i>R28D05-p65ADZp (attP40)</i> ; <i>R55H05-ZpGdbd (attP2)</i> ]                                                    | MCFO-1                                                                                                                                                                                                                                                                                                                                                                                                                                                           | Reconstructed view generated from 3D image stack (Vaa3D/NeuronAnnotator screenshot).                                                                                                                                                                                                      | 63x/ NA 1.4, DPX, 0.19 $\mu\text{m}$ x 0.19 $\mu\text{m}$ x 0.38 $\mu\text{m}$         | 3 optic lobes with from 3 flies imaged at high resolution (63x).                                                                                                                                                                                                                                                                                          |
| 5k; Ext. 9b,e                                  | SS03752 [ <i>R38G02-p65ADZp (attP40)</i> ; <i>R24A07-ZpGdbd (attP2)</i> ]                                                    | MCFO-1                                                                                                                                                                                                                                                                                                                                                                                                                                                           | Reconstructed views generated from 3D image stack (Vaa3D/NeuronAnnotator screenshots) (Ext. 9b,e).<br><br>Illustration in Fig. 5k is based on manually segmented cells (Fluorender).                                                                                                      | 63x/ NA 1.4, DPX, 0.19 $\mu\text{m}$ x 0.19 $\mu\text{m}$ x 0.38 $\mu\text{m}$         | 3 optic lobes from 3 flies imaged at high resolution (63x) (~ 20 LPi43 cells total).                                                                                                                                                                                                                                                                      |
| 1b                                             | VT014708 (GF), OL0047B (LPLC2)                                                                                               | MCFO-7 [ <i>R57C10-Flp2::PEST (attP18)</i> ]; <i>pJFRC210-10XUAS-FRT&gt;STOP&gt;FRT-myr::smGFP-OLLAS (attP2)</i> , <i>pJFRC201-10XUAS-FRT&gt;STOP&gt;FRT-myr::smGFP-HA (VK0005)</i> , <i>pJFRC240-10XUASFRT&gt;STOP&gt;FRT-myr::smGFP-V5-THS-10X-UAS-FRT&gt;STOP&gt;FRT-myr::smGFP-FLAG (su(Hw)attP1)</i> (GF)<br><br><i>pJFRC51-3XUAS-IVS-syt::smHA (su(Hw)attP1)</i> , <i>pJFRC225-5XUAS-IVS-myr::smFLAG (VK00005)</i> (LPLC2; only myr::smFLAG pattern shown) | Illustration based on maximum intensity projection of an overlay of computationally aligned image stacks. Images were manually edited to only show GF and LPLC2 cells.                                                                                                                    | 20x/ NA 0.8, DPX, 0.52 $\mu\text{m}$ x 0.52 $\mu\text{m}$ x 1 $\mu\text{m}$            | Overlap of GF dendrites with LPLC2 target region (identified from anti-Brp reference pattern <sup>ref.10</sup> ) was confirmed for 5 additional MCFO-labeled GF cells from 5 fly brains.                                                                                                                                                                  |
| 2b; 3a                                         | OL0048B                                                                                                                      | <i>pJFRC51-3XUAS-IVS-syt::smHA (su(Hw)attP1)</i> , <i>pJFRC225-5XUAS-IVS-myr::smFLAG (VK00005)</i> (only myr::smFLAG pattern shown)                                                                                                                                                                                                                                                                                                                              | Reconstructed view generated from 3D image stack (Vaa3D/NeuronAnnotator screenshot).                                                                                                                                                                                                      | 63x/ NA 1.4, DPX, 0.19 $\mu\text{m}$ x 0.19 $\mu\text{m}$ x 0.38 $\mu\text{m}$         | Image (same in 2b, 3a) illustrates approximate ROI for calcium imaging. OL0048B pattern has been described <sup>ref.10</sup> .                                                                                                                                                                                                                            |
| 5a; Ext. 6a                                    | SS03752                                                                                                                      | <i>pJFRC51-3XUAS-IVS-syt::smHA (su(Hw)attP1)</i> , <i>pJFRC225-5XUAS-IVS-myr::smFLAG (VK00005)</i> (only myr::smFLAG pattern shown in Ext. Fig. 6a)                                                                                                                                                                                                                                                                                                              | Reconstructed view generated from 3D image stack (Vaa3D/NeuronAnnotator screenshot).                                                                                                                                                                                                      | 63x/ NA 1.4, DPX, 0.19 $\mu\text{m}$ x 0.19 $\mu\text{m}$ x 0.38 $\mu\text{m}$         | 5 optic lobes from 4 flies imaged at high resolution (63x).                                                                                                                                                                                                                                                                                               |
| Ext. 1b                                        | OL0047B                                                                                                                      | <i>pJFRC51-3XUAS-IVS-syt::smHA (su(Hw)attP1)</i> , <i>pJFRC225-5XUAS-IVS-myr::smFLAG (VK00005)</i>                                                                                                                                                                                                                                                                                                                                                               | Reconstructed view generated from 3D image stack (Vaa3D/NeuronAnnotator screenshot).                                                                                                                                                                                                      | 63x/ NA 1.4, DPX, 0.19 $\mu\text{m}$ x 0.19 $\mu\text{m}$ x 0.38 $\mu\text{m}$         | 3 fly brains imaged at high resolution (63x).                                                                                                                                                                                                                                                                                                             |
| Ext. 2a                                        | SS00324 [ <i>R59E08-p65ADZp (attP40)</i> ; <i>R42F06-ZpGdbd (attP2)</i> ] (T4/T5), VT049479- <i>LexAp65 (attP40)</i> (LPLC2) | <i>LexAop2-Syn21-opGCaMP6s (su(Hw)attP8)</i> , <i>10XUAS-Syn21-Chrimson-tdT-3.1(attP18)</i>                                                                                                                                                                                                                                                                                                                                                                      | Maximum intensity projection from substack.                                                                                                                                                                                                                                               | 40x/ NA 1.3, Slow Fade Gold, 0.21 $\mu\text{m}$ x 0.21 $\mu\text{m}$ x 1 $\mu\text{m}$ | Pattern confirmed for 2 fly brains. SS00324 pattern has been described <sup>ref.20</sup> .                                                                                                                                                                                                                                                                |
| 5e; Ext. 7a                                    | SS03752 (Lpi4-3), VT049479- <i>LexAp65 (attP40)</i> (LPLC2)                                                                  | <i>LexAop2-Syn21-opGCaMP6s (su(Hw)attP8)</i> , <i>10XUAS-Syn21-Chrimson-tdT-3.1(attP18)</i>                                                                                                                                                                                                                                                                                                                                                                      | Maximum intensity projection from substack.                                                                                                                                                                                                                                               | 40x/ NA 1.3, Slow Fade Gold, 0.21 $\mu\text{m}$ x 0.21 $\mu\text{m}$ x 1 $\mu\text{m}$ | Pattern confirmed for 2 fly brains.                                                                                                                                                                                                                                                                                                                       |
