# Supplementary material
Source: PubMed Central journal article supplement (PMC7457385)
Supplement: NIHMS912463-supplement-912463_SuppTable3.pdf [file NIHMS912463-supplement-912463_SuppTable3.pdf]

**Supplementary Table 3: Statistics for behavior experiments.**

| r/v 40 @ Azimuth 0 |         |         |       |          |           |           | Tukey HSD score |          |          |          |         |
|--------------------|---------|---------|-------|----------|-----------|-----------|-----------------|----------|----------|----------|---------|
|                    |         |         |       |          |           |           | SS01062         | OL00048B | OL00048B | OL00048B | SS01062 |
| ParentA            | ParentB | Jumpers | Total | Jump Pct | Lower WSI | Upper WSI | Kir2.1          | CTRL_DL  | Kir2.1   | UAS_TNT  | UAS_TNT |
| SS01062            | Kir2.1  | 33      | 135   | 24.444%  | 17.970%   | 32.330%   | 0.00000         | 0.00300  | 2.38300  | 3.74300  | 1.37500 |
| OL00048B           | CTRL_DL | 35      | 139   | 25.180%  | 18.060%   | 32.230%   | 0.00300         | 0.00000  | 2.39700  | 3.77400  | 1.38300 |
| OL00048B           | Kir2.1  | 45      | 133   | 33.835%  | 26.350%   | 42.230%   | 2.38300         | 2.39700  | 0.00000  | 6.13300  | 1.05400 |
| OL00048B           | UAS_TNT | 17      | 140   | 12.143%  | 7.720%    | 18.590%   | 3.74300         | 3.77400  | 6.13300  | 0.00000  | 5.19900 |
| SS01062            | UAS_TNT | 43      | 145   | 29.655%  | 22.820%   | 37.540%   | 1.37500         | 1.38300  | 1.05400  | 5.19900  | 0.00000 |

| r/v 40 @ Azimuth 90 |         |         |       |          |           |           | Tukey HSD score |          |          |          |         |
|---------------------|---------|---------|-------|----------|-----------|-----------|-----------------|----------|----------|----------|---------|
|                     |         |         |       |          |           |           | SS01062         | OL00048B | OL00048B | OL00048B | SS01062 |
| ParentA             | ParentB | Jumpers | Total | Jump Pct | Lower WSI | Upper WSI | Kir2.1          | CTRL_DL  | Kir2.1   | UAS_TNT  | UAS_TNT |
| SS01062             | Kir2.1  | 50      | 140   | 35.714%  | 28.256%   | 43.935%   | 0.00000         | 2.43500  | 2.30300  | 2.58000  | 5.34700 |
| OL00048B            | CTRL_DL | 72      | 158   | 45.570%  | 38.001%   | 53.348%   | 2.43500         | 0.00000  | 0.05900  | 5.11100  | 3.06700 |
| OL00048B            | Kir2.1  | 63      | 139   | 45.324%  | 37.285%   | 53.614%   | 2.30300         | 0.05900  | 0.00000  | 4.89500  | 3.03100 |
| OL00048B            | UAS_TNT | 37      | 144   | 25.694%  | 19.254%   | 33.398%   | 2.58000         | 5.11100  | 4.89500  | 0.00000  | 7.97000 |
| SS01062             | UAS_TNT | 82      | 141   | 58.156%  | 49.903%   | 65.976%   | 5.34700         | 3.06700  | 3.03100  | 7.97000  | 0.00000 |

| r/v 80 @ Azimuth 0 |         |         |       |          |           |           | Tukey HSD score |          |          |          |          |
|--------------------|---------|---------|-------|----------|-----------|-----------|-----------------|----------|----------|----------|----------|
|                    |         |         |       |          |           |           | SS01062         | OL00048B | OL00048B | OL00048B | SS01062  |
| ParentA            | ParentB | Jumpers | Total | Jump Pct | Lower WSI | Upper WSI | Kir2.1          | CTRL_DL  | Kir2.1   | UAS_TNT  | UAS_TNT  |
| SS01062            | Kir2.1  | 50      | 147   | 34.014%  | 26.849%   | 41.992%   | 0.00000         | 0.22800  | 0.37400  | 9.19600  | 1.72600  |
| OL00048B           | CTRL_DL | 43      | 130   | 33.077%  | 25.577%   | 41.548%   | 0.22800         | 0.00000  | 0.58700  | 8.69900  | 1.90000  |
| OL00048B           | Kir2.1  | 49      | 138   | 35.507%  | 28.015%   | 43.785%   | 0.37400         | 0.58700  | 0.00000  | 9.42200  | 1.32700  |
| OL00048B           | UAS_TNT | 7       | 135   | 5.185%   | 2.534%    | 10.316%   | 9.19600         | 8.69900  | 9.42200  | 0.00000  | 10.84100 |
| SS01062            | UAS_TNT | 59      | 144   | 40.972%  | 33.276%   | 49.138%   | 1.72600         | 1.90000  | 1.32700  | 10.84100 | 0.00000  |

| r/v 80 @ Azimuth 90 |         |         |       |          |           |           | Tukey HSD score |          |          |          |         |
|---------------------|---------|---------|-------|----------|-----------|-----------|-----------------|----------|----------|----------|---------|
|                     |         |         |       |          |           |           | SS01062         | OL00048B | OL00048B | OL00048B | SS01062 |
| ParentA             | ParentB | Jumpers | Total | Jump Pct | Lower WSI | Upper WSI | Kir2.1          | CTRL_DL  | Kir2.1   | UAS_TNT  | UAS_TNT |
| SS01062             | Kir2.1  | 73      | 147   | 49.660%  | 41.690%   | 57.648%   | 0.00000         | 1.31700  | 3.03400  | 6.38600  | 2.94100 |
| OL00048B            | CTRL_DL | 79      | 140   | 56.429%  | 48.152%   | 64.362%   | 1.31700         | 0.00000  | 1.40700  | 7.89200  | 1.29700 |
| OL00048B            | Kir2.1  | 86      | 138   | 62.319%  | 54.003%   | 69.967%   | 3.03400         | 1.40700  | 0.00000  | 9.25500  | 0.12400 |
| OL00048B            | UAS_TNT | 32      | 134   | 23.881%  | 17.454%   | 31.763%   | 6.38600         | 7.89200  | 9.25500  | 0.00000  | 9.22800 |
| SS01062             | UAS_TNT | 89      | 144   | 61.806%  | 53.661%   | 69.337%   | 2.94100         | 1.29700  | 0.12400  | 9.22800  | 0.00000 |
